# Supplementary material for: Chlorine-additive-promoted incorporation of Mn2+ dopants into CsPbCl3 perovskite nanocrystals
Source: Royal Society of Chemistry journal article supplement (doi:10.1039/c9nr04663a), 2019-01-01
Supplement: c9nr04663a1.pdf [file c9nr04663a1.pdf]

# Electronic Supporting Information

## Chlorine-Additives-Promoted Incorporation of $\text{Mn}^{2+}$ Dopants in $\text{CsPbCl}_3$ Perovskite Nanocrystals

Su Zhou<sup>a</sup>, Yiwen Zhu<sup>a</sup>, Jiasong Zhong<sup>a,\*</sup>, Feifan Tian<sup>b,c</sup>, Hai Huang<sup>b,c</sup>, Jiangkun Chen<sup>b,c</sup>, Daqin Chen<sup>a,b,c,\*</sup>

<sup>a</sup>College of Materials & Environmental Engineering, Hangzhou Dianzi University, Hangzhou, Zhejiang, 310018, P. R. China

<sup>b</sup>College of Physics and Energy, Fujian Normal University, Fuzhou, Fujian 350117, China

<sup>c</sup>Fujian Provincial Collaborative Innovation Center for Optoelectronic Semiconductors and Efficient Devices, Xiamen, Fujian, 361005, China

### Corresponding Authors

\*E-Mail: jiasongzhong@hdu.edu.cn (J. S. Zhong); dqchen@fjnu.edu.cn (D. Q. Chen)

## Experimental Section

### Materials.

Cs<sub>2</sub>CO<sub>3</sub> (Aladdin, 99.9%), octadecene (ODE, Aladdin, 90%), oleic acid (OA, Aldrich, 90%), oleylamine (OM, Aladdin, 80-90%), tri-n-octylphosphine (TOP, Macklin, 90%) PbCl<sub>2</sub> (Macklin, 99.9%), manganese acetate (Mn(Ac)<sub>2</sub>, Macklin, 99%), MnCl<sub>2</sub> (Aladdin, 99%), NiCl<sub>2</sub>·6H<sub>2</sub>O (Macklin 99%), CuCl<sub>2</sub> (Macklin 99%), ZnCl<sub>2</sub> (Macklin 99%), trimethylchlorosilane (TMS-Cl, Macklin 99%), hexane (Aladdin, 99%) . All chemicals were directly used without further purification.

### Preparation of Cs-oleate

Cs<sub>2</sub>CO<sub>3</sub> (0.407 g, 1.25 mmol) was loaded into a 50 mL 3-neck flask along with ODE (18 mL) and OA (1.74 mL), heated for 1 h at 120 °C to remove water, and then heated under N<sub>2</sub> to 150 °C until all Cs<sub>2</sub>CO<sub>3</sub> were dissolved. The solution was preheated to 100 °C before injection.

### Preparation of OM-Cl

10 mL OM and 1 mL hydrohalic acid (HCl) were loaded in 25 mL three-neck flask and heated under N<sub>2</sub> at 120 °C for at least 2 h. Then temperature was elevated to 150 °C for 1 hour. The prepared OM-Cl was preheated to 100 °C for further usage.

### Synthesis of Mn<sup>2+</sup>-doped CsPbCl<sub>3</sub> NCs

PbCl<sub>2</sub> (0.1mmol, 0.0278g), Mn(Ac)<sub>2</sub> (0.1mmol, 0.0245g), ODE (10 mL), OA (2 mL), OM (2 mL), and different amount of TMS-Cl (0~3 mmol) were added into a 50 mL three-neck flask heated under N<sub>2</sub> at 120 °C for at least 1 h to dissolve the precursors and remove water. Then, temperature was raised to 170 °C and kept at this temperature for 5 min. Then, the prepared Cs-oleate solution (0.4 mL) was quickly injected and reacted for 1 min. The mixture was finally cooled by an ice-water bath to room temperature. The procedure is similar when MnCl<sub>2</sub> was used as Mn<sup>2+</sup> source or OM-Cl was employed as Cl<sup>-</sup> source.

### Synthesis of TM-doped CsPbCl<sub>3</sub> NCs

For the synthesis of TM-doped CsPbCl<sub>3</sub> NCs, PbCl<sub>2</sub> (0.1mmol, 0.0278g), TMCl<sub>2</sub> (TM=Mn, Ni, Cu, Zn) (0.1mmol), ODE (10 mL), OA (2 mL), OM (2 mL), and different amount of TMS-Cl (0.5 mol, 1 mmol) were added into a 50 mL three-neck flask 1 mL TOP was further added to promote dissolving. The mixture was heated under N<sub>2</sub> at 120 °C for at least 1 h to dissolve the precursors and remove water. Then, temperature was raised to 170 °C and kept at this temperature for 5 min. Then, the prepared Cs-oleate solution (0.4 mL) was quickly injected and reacted for 1 min. Finally, the reaction mixture was cooled by an ice-water bath.

### Cation exchange

- (a) Cation exchange at 170°C. 0.5 mmol MnCl<sub>2</sub> was dissolved in 5 mL OED, 1 mL OA and 1 mL OM at 150 °C for further using. The prepared MnCl<sub>2</sub> ODE/OA/OM solution was injected into three-necked flask immediately after Cs-OA has been injected.
- (b) Cation exchange at room temperature. Prepared CsPbCl<sub>3</sub> NCs were dispersed in toluene and MnCl<sub>2</sub> solution (dissolved in ODE/OA/OM or 3 mL DMF) was injected.

### Purification

Mn-doped CsPbCl<sub>3</sub> NCs and TM-doped CsPbCl<sub>3</sub> NCs were extracted from the crude solution by centrifuging at 8000 rpm for 5 min to discard the supernatant containing unreacted precursor. Then, 1 mL hexane was added into the precipitates to disperse, and centrifuged at 10000 rpm for 5 min and the supernatant was discarded. This step must be repeated at least twice. After centrifugation, the supernatant was discarded and the precipitates were re-dispersed in hexane for further characterization.

### Characterization

X-ray diffraction (XRD) analysis was carried out to identify perovskite phase structures using a powder diffractometer (MiniFlex600 RIGAKU) with Cu K<sub>α</sub> radiation ( $\lambda = 0.154$  nm) operating at 40 kV. Microstructure observations of Mn-doped CsPbCl<sub>3</sub> perovskite NCs were carried out on a JEOL JEM-2010 transmission electron microscopy (TEM) operated at 200 kV accelerating

voltage. The actual chemical compositions were determined by inductively coupled plasma mass spectroscopy (ICP-MS) technique using a Perkin-Elmer Optima 3300DV spectrometer. Electron paramagnetic resonance (EPR) spectra were recorded by an E-580 Bruker Eleksys X-band EPR spectrometer. Mn 2p X-ray photoelectron spectroscopy (XPS) was determined using a VG Scientific ESCA Lab Mark II spectrometer equipped with two ultra-high-vacuum 6 chambers. Absorption, photoluminescence (PL) spectra and Mn<sup>2+</sup> decay curves were recorded on an Edinburgh Instruments FS5 spectrofluorometer equipped with 150 W xenon lamps and 60 W pulse xenon lamps as the excitation sources. Time-resolved spectra for exciton recombination were detected on a fluorescent lifetime spectrometer (Edinburgh Instruments, LifeSpec-II) based on a time correlated single photon counting technique under the excitation of 375 nm picosecond laser. The decay lifetimes are determined via the equation of  $\tau = \int I(t)dt / I_0$ , where  $I(t)$  is the time-related luminescence intensity and  $I_0$  is the peak intensity. PL quantum yield (PLQY), defined as the ratio of emitted photons to absorbed ones, was determined by a spectra fluorometer (FS5) equipped with the xenon lamp as the excitation source and a 15 cm integrating sphere. Temperature-dependent PL spectra were measured on an Edinburgh Instruments FLS980 spectrofluoremeter equipped with a Linkam THMS600 temperature controlling stage.

**Table S1** ICP-MS results of Mn-doped CsPbCl<sub>3</sub> NCs prepared with the addition of different TMS-Cl concentrations.

| Mn(Ac) <sub>2</sub> content<br>(mmol) | Mn-to-Pb<br>feeding molar<br>ratio | TMS-Cl content<br>(mmol) | measured Mn-to-<br>Pb molar ratio |
|---------------------------------------|------------------------------------|--------------------------|-----------------------------------|
| 0                                     | 0:1                                | 0                        | 0:1                               |
| 0.1                                   | 1:1                                | 0                        | 0.007:1                           |
| 0.1                                   | 1:1                                | 0.5                      | 0.032:1                           |
| 0.1                                   | 1:1                                | 1                        | 0.056:1                           |
| 0.1                                   | 1:1                                | 1.5                      | 0.066:1                           |
| 0.1                                   | 1:1                                | 2                        | 0.078:1                           |
| 0.1                                   | 1:1                                | 3                        | 0.103:1                           |

**Table S2** ICP-MS results of TM-doped (TM=Mn, Ni, Cu, Zn) CsPbCl<sub>3</sub> NCs prepared with the addition of different TMS-Cl concentrations.

|                    | Mn-to-Pb<br>molar ratio | Ni-to-Pb<br>molar ratio | Cu-to-Pb<br>molar ratio | Zn-to-Pb<br>molar ratio |
|--------------------|-------------------------|-------------------------|-------------------------|-------------------------|
| 0.5mmol<br>TMS-Cl  | 0.032:1                 | 0.033:1                 | 0.041:1                 | 0.027:1                 |
| 1.0 mmol<br>TMS-Cl | 0.056:1                 | 0.053:1                 | 0.057:1                 | 0.049:1                 |

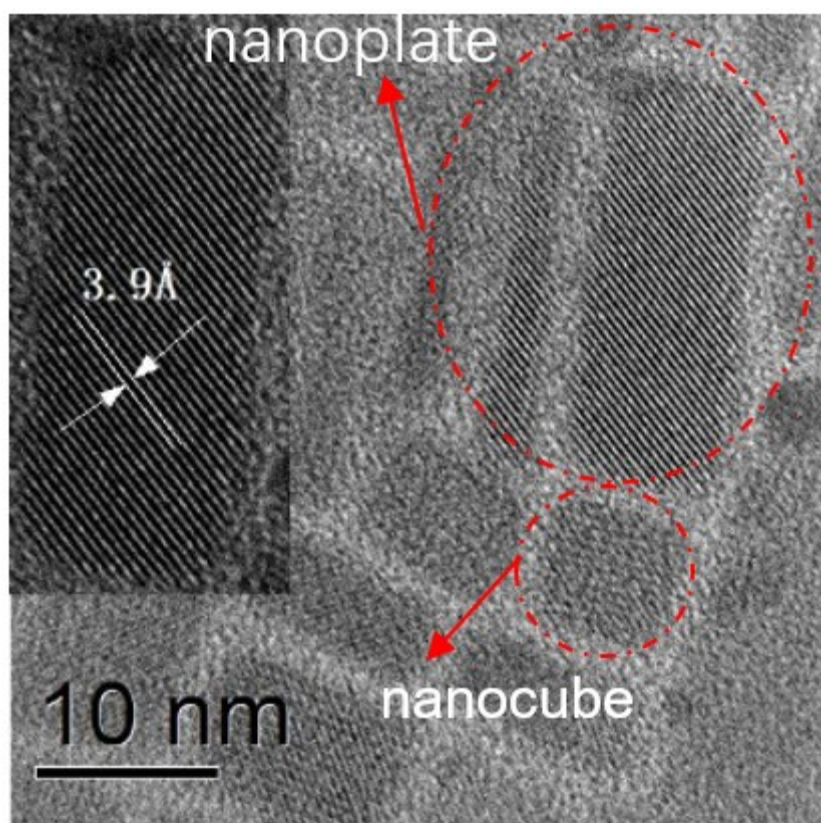

**Figure S1** HRTEM micrograph of Mn-doped CsPbCl<sub>3</sub> prepared with the addition of 3 mmol TMS-Cl. Two morphologies of nanoplatelet and nanocube are clearly discerned.

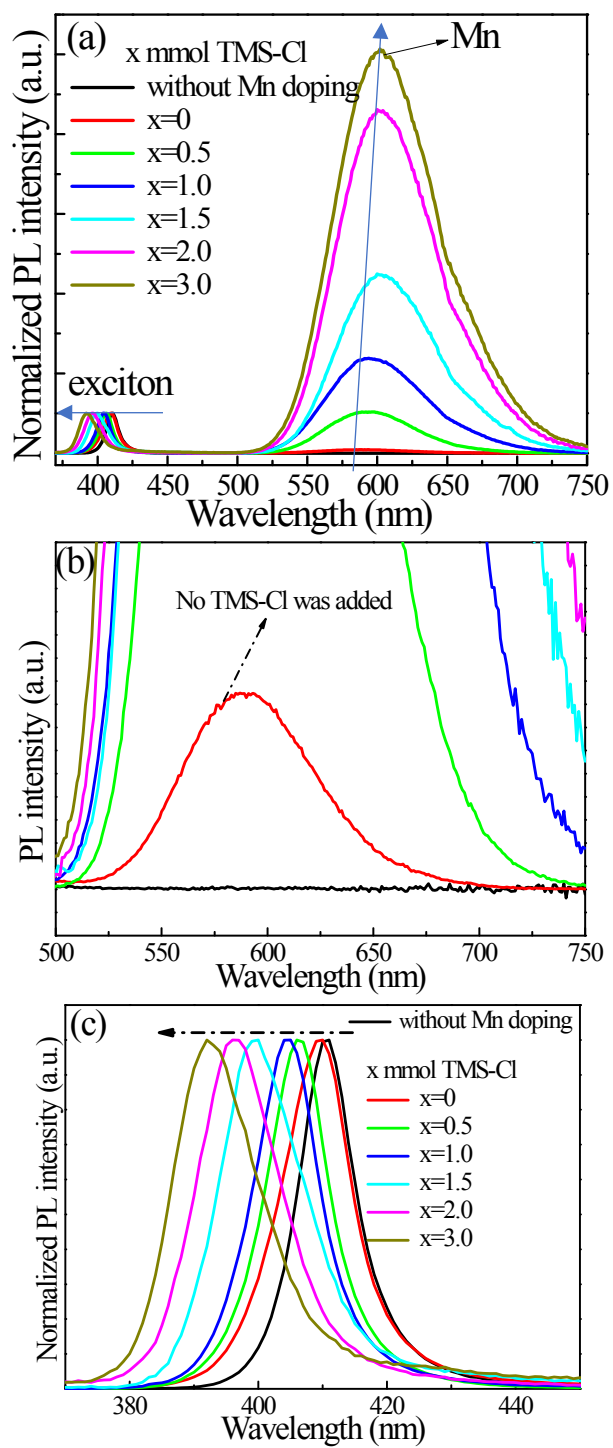

**Figure S2** (a) PL spectra of Mn-doped CsPbCl<sub>3</sub> NCs, and enlarged PL spectra of (b) Mn<sup>2+</sup> dopants and (c) CsPbCl<sub>3</sub> host NCs with increase of TMS-Cl content.

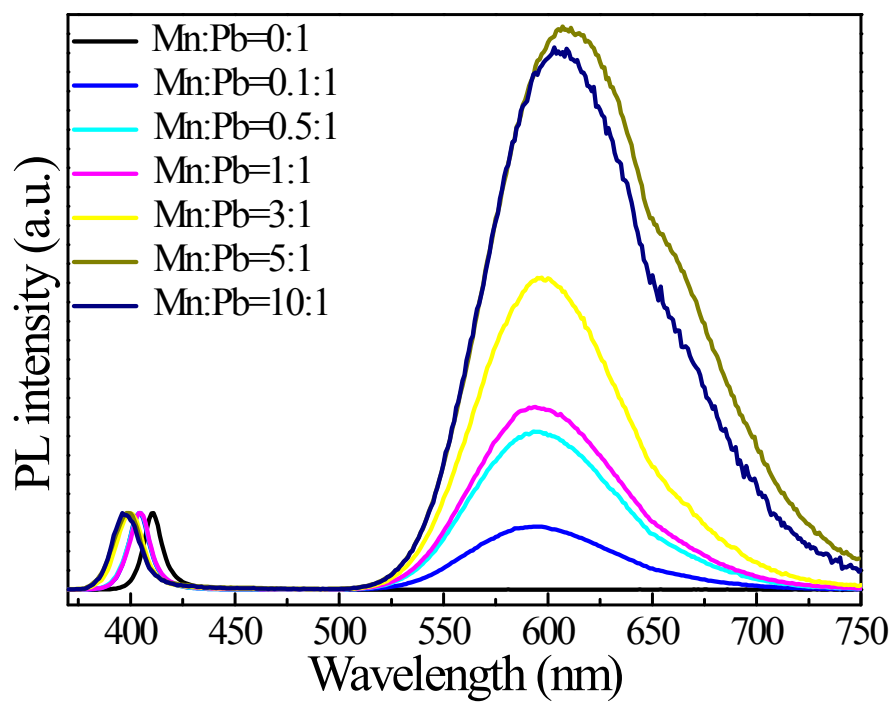

**Figure S3** PL spectra of Mn-doped CsPbCl<sub>3</sub> perovskite NCs prepared with fixed TMS-Cl content (1mmol) and increased Mn-to-Pb feeding ratio from 0:1 to 10:1.

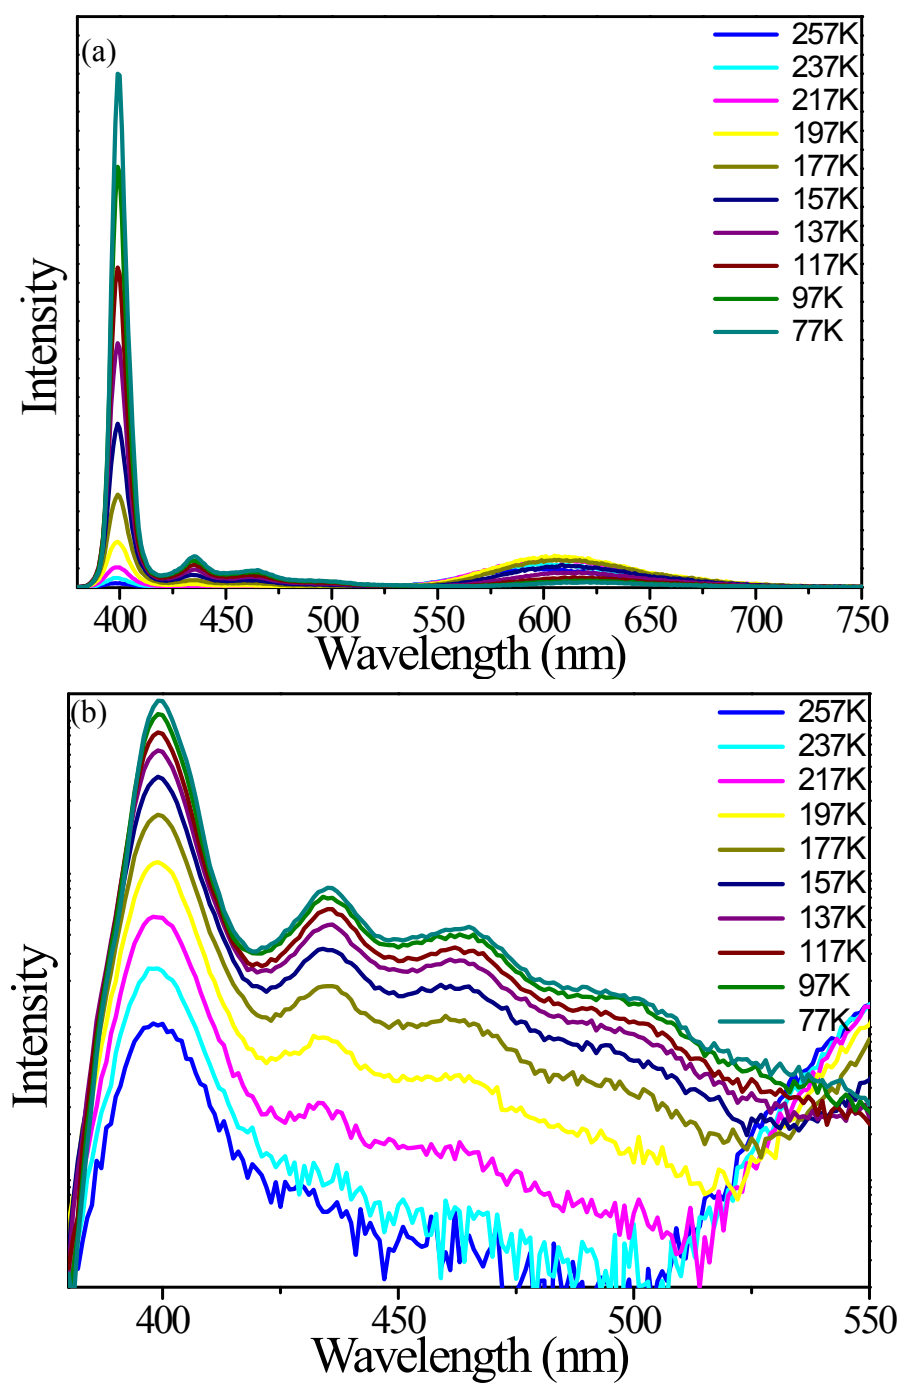

**Figure S4** (a) Temperature evolution for PL spectra of Mn-doped CsPbCl<sub>3</sub> NCs prepared with 3 mmol TMS-Cl. (b) Logarithm plot of PL spectra in the range from 390 nm to 550 nm.

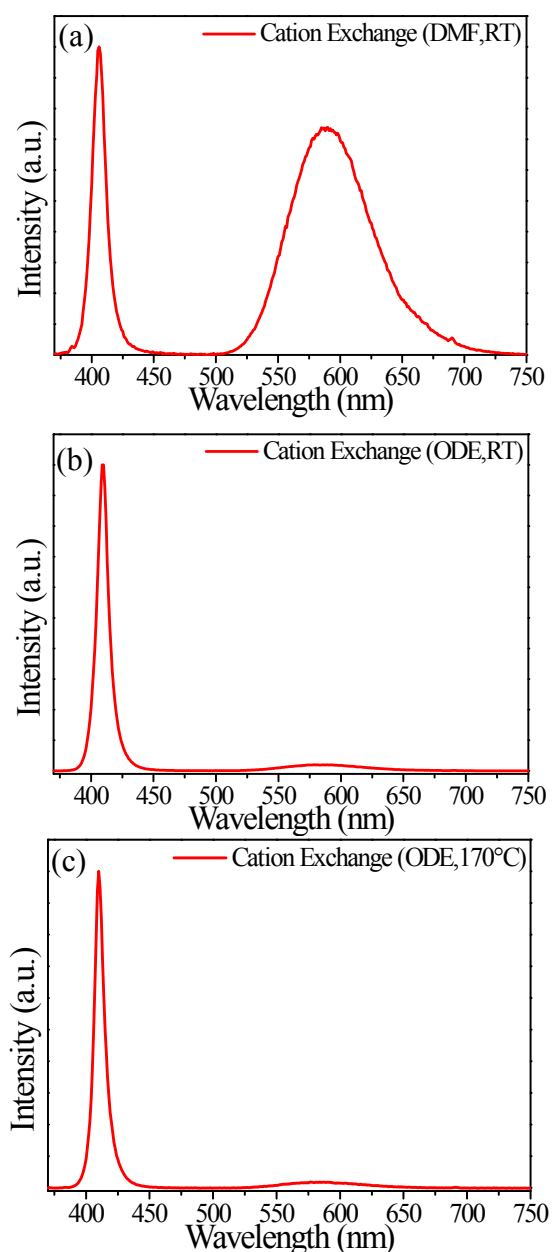

**Figure S5** PL spectra of Mn-doped CsPbCl<sub>3</sub> perovskite NCs synthesized via a cation exchange route in three conditions.

(a) MnCl<sub>2</sub> was dissolved in DMF solution and mixed with preformed CsPbCl<sub>3</sub> NCs (in toluene) to carry out cation exchange at room temperature.

(b) MnCl<sub>2</sub> was dissolved in ODE/OA/OM solution and mixed with preformed CsPbCl<sub>3</sub> NCs (in toluene) to carry out cation exchange at room temperature.

(c) MnCl<sub>2</sub> is dissolved in ODE/OA/OM and mixed with preformed CsPbCl<sub>3</sub> NCs (in ODE/OA/OM) to carry out cation exchange at 170°C.

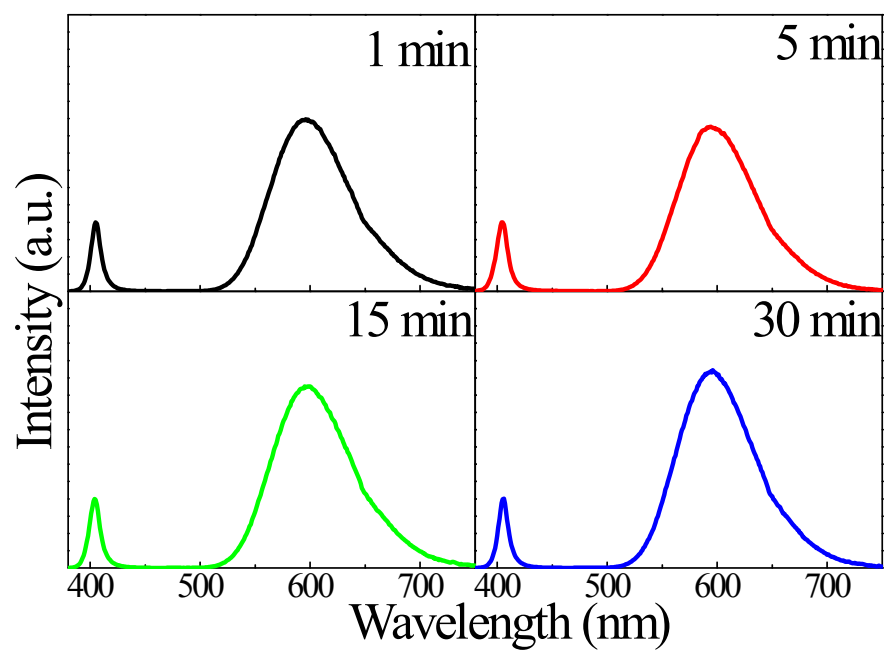

**Figure S6** PL spectra of Mn-doped CsPbCl<sub>3</sub> perovskite NCs synthesized by reaction at 170 °C for different durations (1 min, 5 min, 15 min and 30 min).

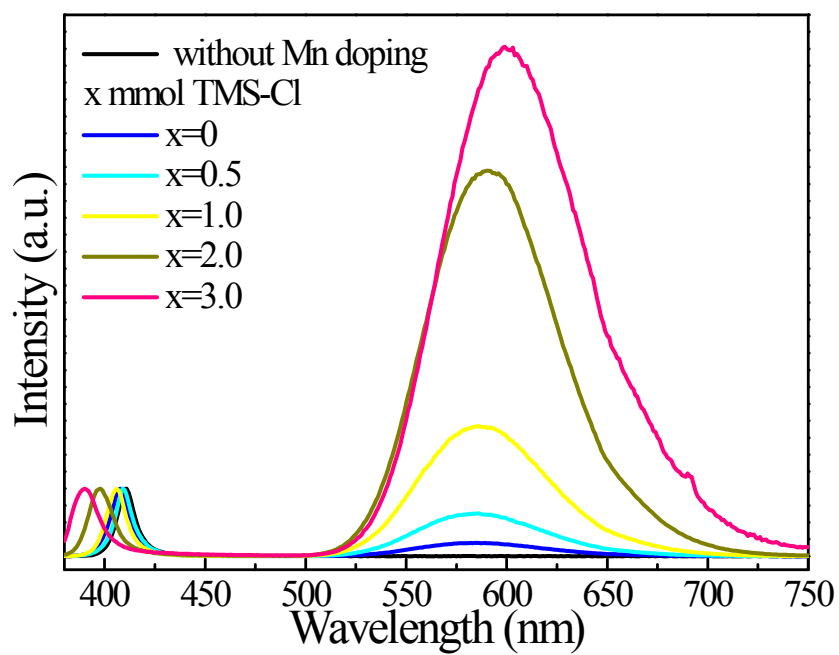

**Figure S7** Normalized PL spectra of Mn-doped CsPbCl<sub>3</sub> NCs prepared by using MnCl<sub>2</sub> precursor as Mn<sup>2+</sup> source and TMS-Cl as extra Cl<sup>-</sup> source. The Mn-to-Pb feeding ratio was fixed to 1:1 for all the samples.

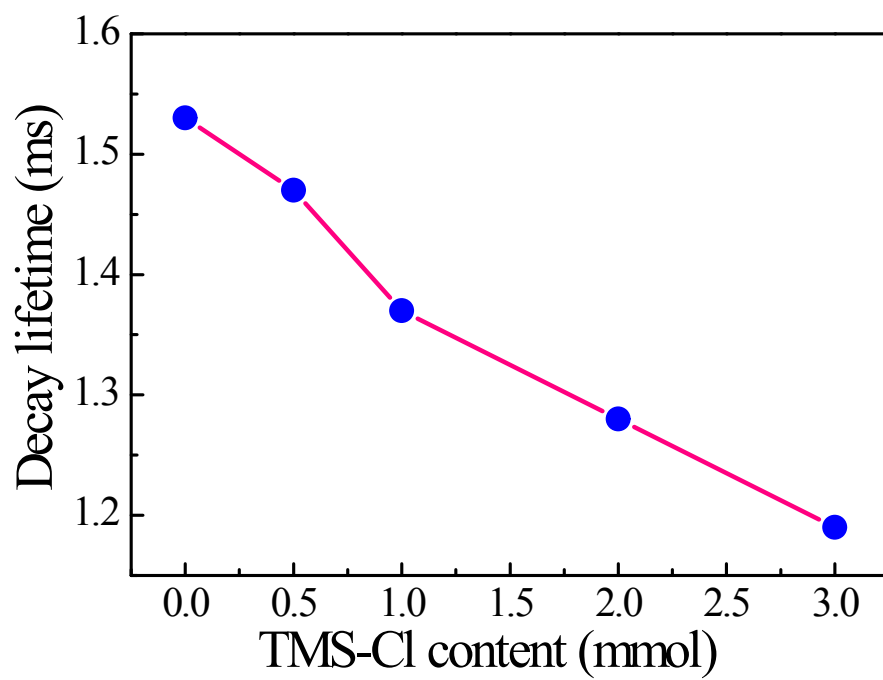

**Figure S8** Decay lifetime of Mn<sup>2+</sup> dopants in CsPbCl<sub>3</sub> NCs versus TMS-Cl content.

The Mn-doped CsPbCl<sub>3</sub> NCs were prepared using MnCl<sub>2</sub> precursor as Mn<sup>2+</sup> source and TMS-Cl as extra Cl<sup>-</sup> source. The Mn-to-Pb feeding ratio was fixed to 1:1 for all the samples.

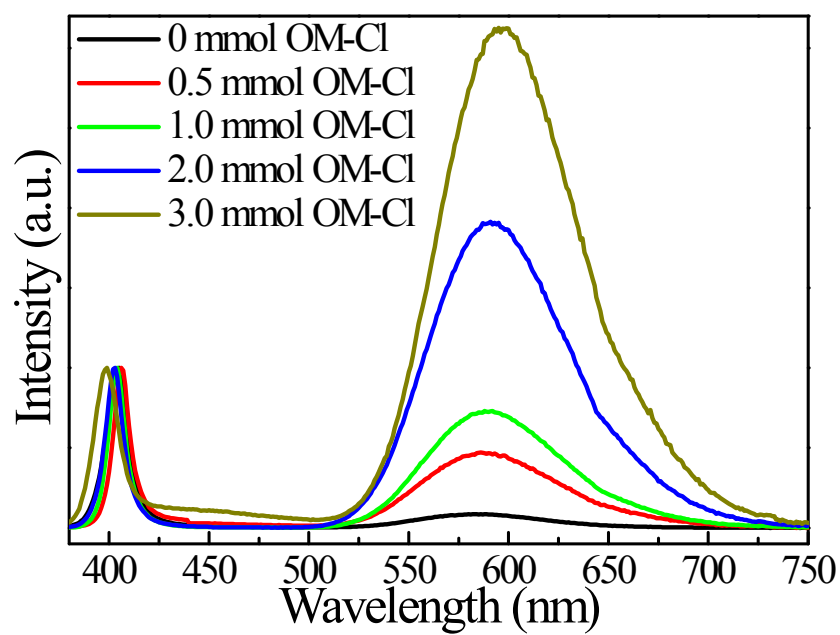

**Figure S9** Normalized PL spectra of Mn-doped CsPbCl<sub>3</sub> NCs prepared by using Mn(Ac)<sub>2</sub> precursor as Mn<sup>2+</sup> source and OM-Cl as extra Cl<sup>-</sup> source. The Mn-to-Pb feeding ratio was fixed to 1:1 for all the samples.

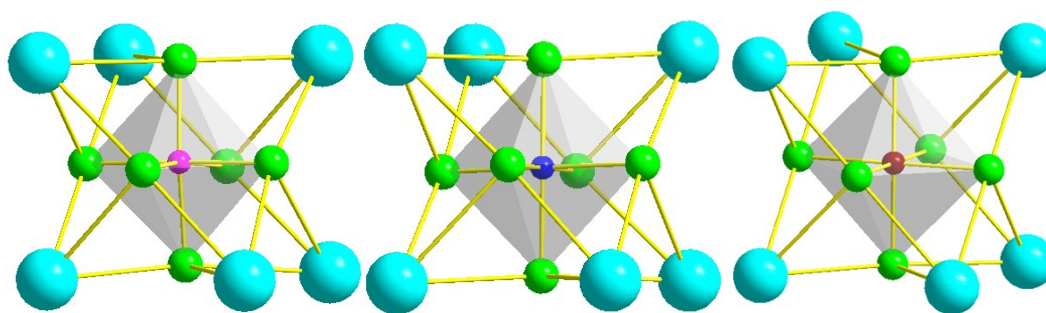

**Figure S10** Schematic illustrations of CsTMCl<sub>3</sub> crystal structures (from left to right: TM=Ni, Cu, Zn). All the crystals possess similar [TMCl<sub>6</sub>]<sup>4-</sup> octahedral structure units.

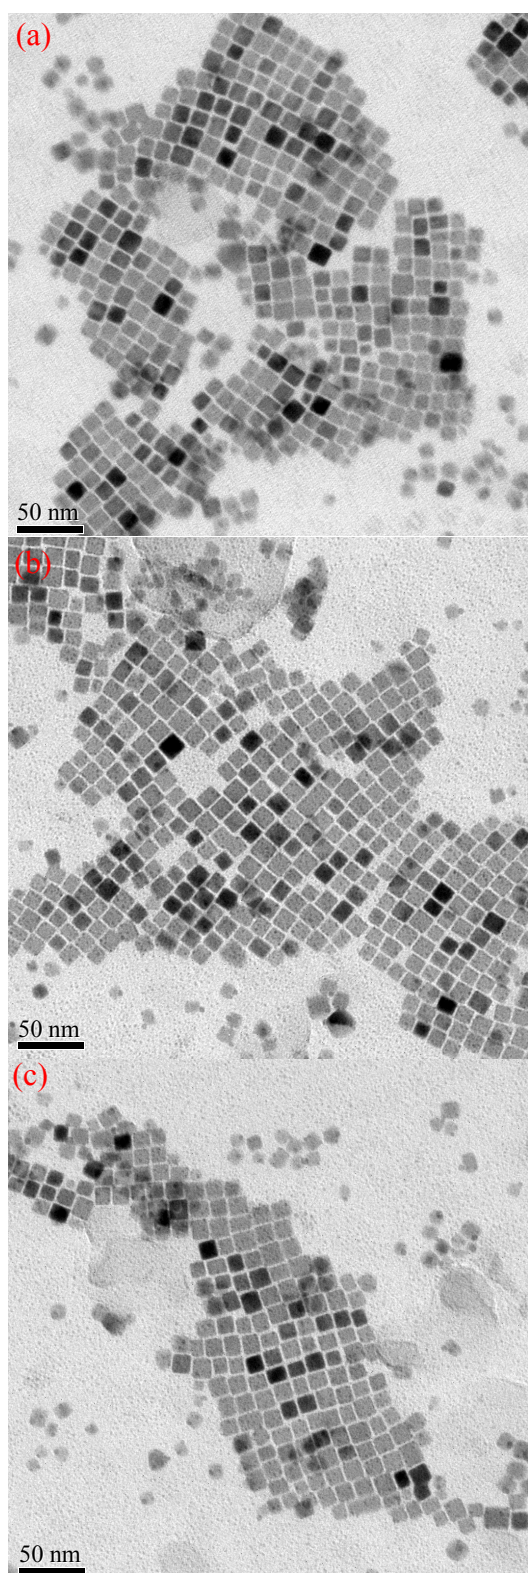

**Figure S11** TEM images of TM-doped (TM=Ni, Cu, Zn) CsPbCl<sub>3</sub> perovskite NCs: (a) Ni, (b) Cu, (c) Zn. All the samples were prepared by using TMCl<sub>2</sub> precursor as TM<sup>2+</sup> source and TMS-Cl (1 mmol) as extra Cl<sup>-</sup> source. The TM-to-Pb feeding ratio was fixed to 1:1 for all the samples. The bar represent 50 nm.

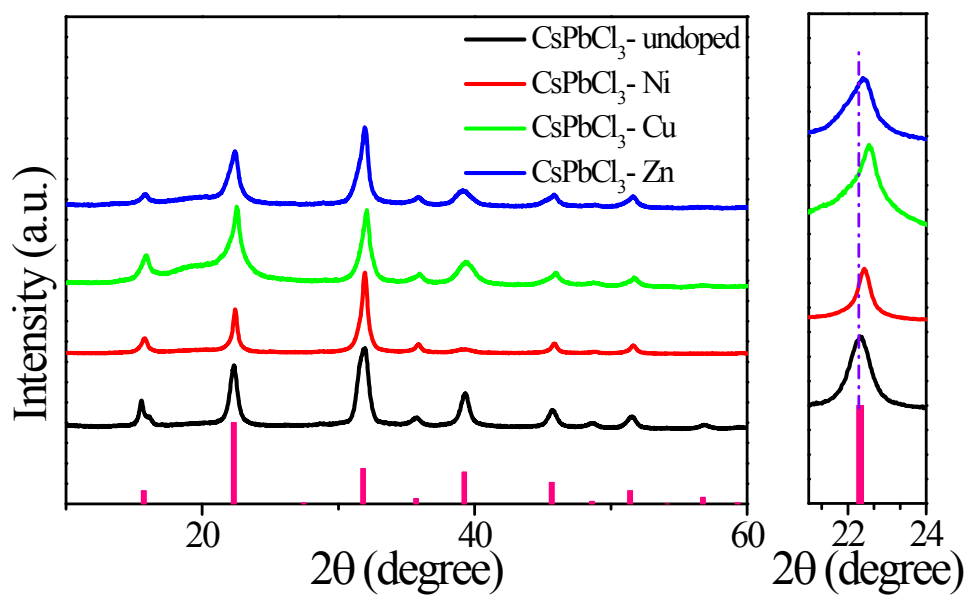

**Figure S12** XRD patterns of TM-doped (TM=Ni, Cu, Zn)  $\text{CsPbCl}_3$  perovskite NCs prepared by using  $\text{TMCl}_2$  precursor as  $\text{TM}^{2+}$  source and TMS-Cl (1 mmol) as extra  $\text{Cl}^-$  source. The TM-to-Pb feeding ratio was fixed to 1:1 for all the samples.

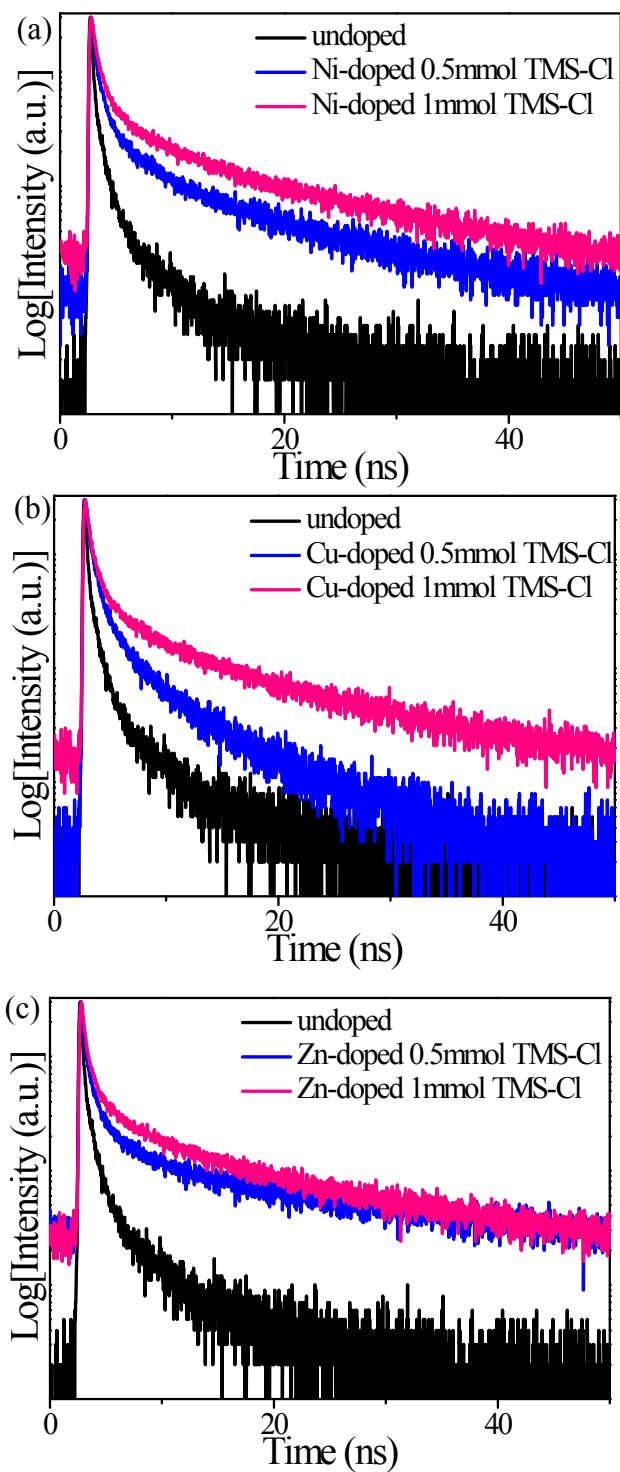

**Figure S13** Time-resolved PL spectra by monitoring exciton recombination ( $\lambda_{\text{em}}=400$  nm) for the TM-doped CsPbCl<sub>3</sub> perovskite NCs: (a) TM=Ni, (b) TM=Cu, (c) TM=Zn.
